# Supplementary material for: Responsive fluorinated lanthanide probes for 19F magnetic resonance spectroscopy
Source: Royal Society of Chemistry journal article supplement (doi:10.1039/b705844f), 2007-01-01
Supplement: b705844f.pdf [file b705844f.pdf]

## ESI

### Responsive Fluorinated Lanthanide Probes for $^{19}\text{F}$ Magnetic Resonance Spectroscopy

P. Kanthi Senanayake, Alan M. Kenwright, David Parker\* and Susanna K. van der Hoorn.

1. Plot of the variation of ratio of Eu emission band intensities vs pH for  $[\text{EuL}^2]/[\text{EuL}^2\text{H}]$ .
2. Ligand and Complex Synthesis.
3. Equations defining the temperature and field dependence of  $R_1$  and  $R_2$  for lanthanide systems.

#### ESI Figure 1

Variation of the ratio of Eu emission band intensities ( $\lambda_{\text{exc}}$  255 nm, 298K,  $\text{H}_2\text{O}$ , 0.1 M NaCl) versus pH ; the inset shows the first derivative plot consistent with an apparent protonation constant of 5.5.

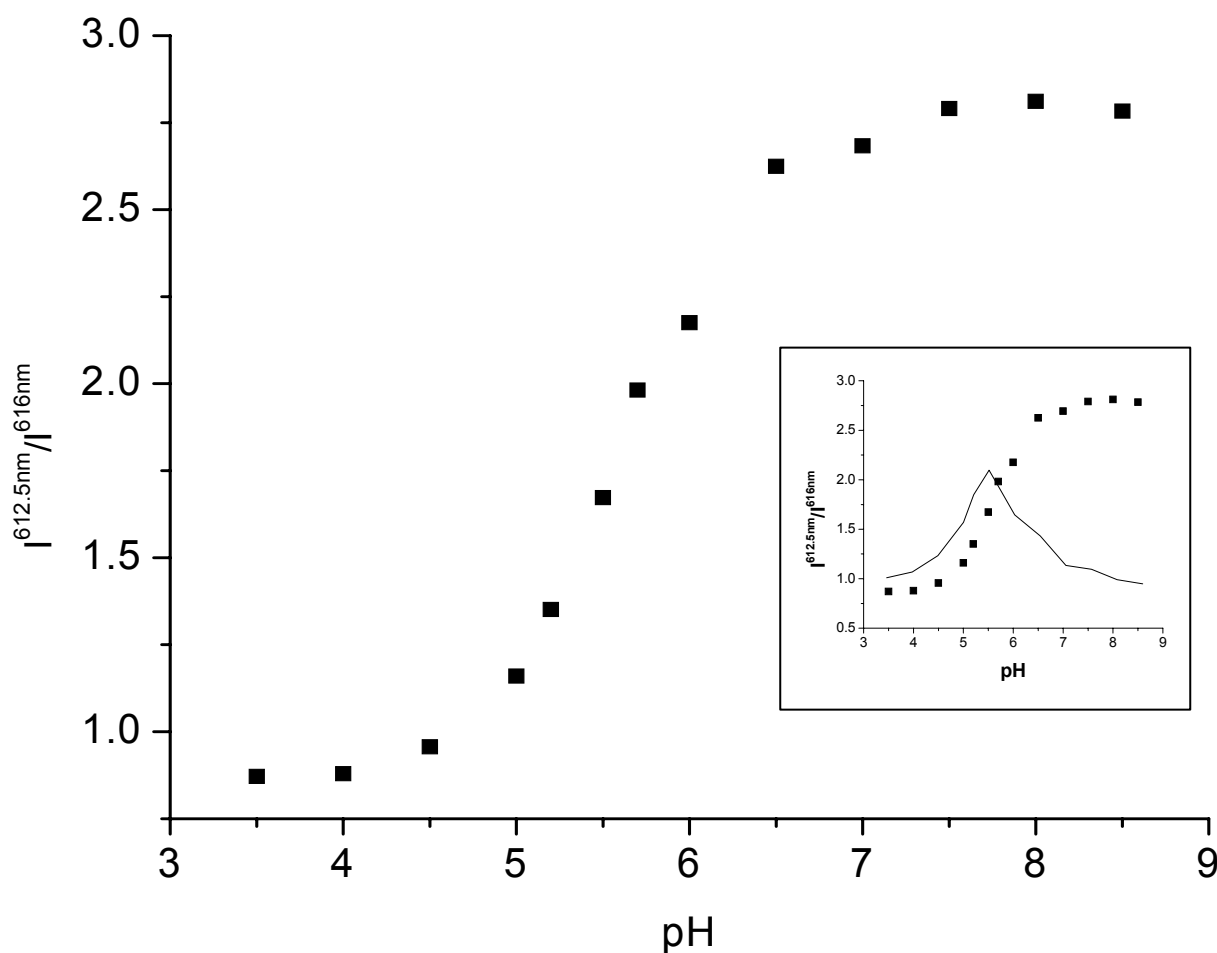

## 2. Ligand and Complex Synthesis

### N-2-Chloroethyl-2',5'-bis(trifluoromethyl)benzenesulfonamide, 4.

2,5-Bis(trifluoromethyl) benzenesulfonyl chloride (2g, 6.39 mmol) was added to a solution of ethanolamine (0.20g, 3.19 mmol) and pyridine (0.62g, 7.67 mmol) in dichloromethane (15 cm<sup>3</sup>) while maintaining the temperature below -10°C. The reaction mixture was kept at 4°C overnight and then poured onto ice. The product was extracted using dichloromethane (15 cm<sup>3</sup>), washed with water (3x20cm<sup>3</sup>), dried (K<sub>2</sub>CO<sub>3</sub>), filtered and solvent removed under reduced pressure to yield a white solid that was purified using column chromatography on silica, (DCM, R<sub>f</sub>= 0.5) to give a colourless solid (0.5g, 44%), m.p. 65-67°C, m/z (ES<sup>+</sup>): 355, δ<sub>H</sub> (CDCl<sub>3</sub>, 200MHz) : 3.41 (m, 2H, CH<sub>2</sub>NH), 3.59 (t, J= 6Hz, 2H, CH<sub>2</sub>Cl), 5.29(t, J=6Hz, 1H, NH), 8.00 (m, 2H, Ar, C3 and C4 ), 8.47 (s, 1H, Ar C6), δ<sub>C</sub>(CDCl<sub>3</sub> , 50.3 MHz): 43.52 (CH<sub>2</sub>NH), 45.23 (CH<sub>2</sub>Cl), 119.82 [q, <sup>1</sup>J<sub>CF</sub> 18, C-2(CF<sub>3</sub>)], 125.29 [q, <sup>2</sup>J<sub>CF</sub> 18, (C-5(CF<sub>3</sub>)], 128.50(Ar CH), 128.61(Ar CH), 129.92(Ar CH), 133.07(q, <sup>1</sup>J<sub>CF</sub> 162 Hz, CF<sub>3</sub>), 140.64 (Ar C). δ<sub>F</sub> (CDCl<sub>3</sub> , 188MHz): -58.2 (o-F), -63.7 (m-F). Found: C, 33.66%; H, 2.22%; N, 3.45%. C<sub>10</sub>H<sub>8</sub>NSO<sub>2</sub>F<sub>6</sub>Cl requires: C, 33.76%; H, 2.25%; N, 3.39%.

### 1-(2',5'-Bis(trifluoromethyl)benzenesulfonamidoethyl)-4,7,10, tris(*tert*-butoxycarbonylmethyl)-1,4,7,10-tetraazacyclododecane

To the 2,5-bis(trifluoromethyl) benzenesulfonamide, 4, (0.15g, 0.42 mmol) was added to a solution of 1,4,7-tris(*tert*-butoxycarbonylmethyl)-1,4,7,10-tetraazacyclododecane, 1, (0.22g, 0.42mmol) and K<sub>2</sub>CO<sub>3</sub> (0.09g, 0.63g) in acetonitrile (10 cm<sup>3</sup>) heated at reflux overnight. Inorganic solids were filtered off, solvent was removed under reduced pressure and the tris-ester N-alkylated product was purified using column chromatography on silica, (5% MeOH / DCM R<sub>f</sub>= 0.3) to give an oily material, (0.25g, 79%). m/z (ES<sup>+</sup>): 834 (M<sup>+</sup>), 856 [(M+Na)<sup>+</sup>], 872 [(M+K)<sup>+</sup>]. δ<sub>H</sub> (CDCl<sub>3</sub>, 200MHz) : 1.46 (s, 27H, t-Bu), 2.43 (br, 16H, ring CH<sub>2</sub>N), 2.55 (m, 6H, NCH<sub>2</sub>CO), 3.09 (br, 4H, NCH<sub>2</sub>), 3.31(s, br, 1H, NH), 7.57 (d, 1H, J=8Hz, Ar ring C4), 7.77 (d, 1H, J=8Hz, Ar ring C3), 8.49 (s, 1H, Ar ring C6). δ<sub>C</sub>(CDCl<sub>3</sub>, 50.3MHz) : 28.27, 28.43 [C(CH<sub>3</sub>)], 43.06(CH<sub>2</sub>NH), 52.22, 53.60, 55.61, 56.93, 58.52 (CH<sub>2</sub>N), 56.41, 57.22, 57.52 (CH<sub>2</sub>CO), 81.93[C(CH<sub>3</sub>)], 119.80 [q, <sup>2</sup>J<sub>CF</sub> 18, C-2(CF<sub>3</sub>)], 125.27[q, <sup>2</sup>J<sub>CF</sub> 18, (C-5(CF<sub>3</sub>)], 128.51 (Ar CH), 128.63 (Ar CH), 129.92(Ar CH), 133.07 (q, <sup>1</sup>J<sub>CF</sub> 163 Hz, CF<sub>3</sub>), 140.64 (Ar C) 171.4, 171.6(C=O). δ<sub>F</sub>(CDCl<sub>3</sub>, 188 MHz): -58.4 (o-F), -63.5 (m-F) .

### H<sub>6</sub>L<sup>2</sup> (CF<sub>3</sub>CO<sub>2</sub>)<sub>2</sub>

Ligand L<sup>2</sup> (0.25g, 3.0 mmol) was dissolved in dichloromethane (2mL) and treated with TFA (3mL) and the solution stirred at room temperature overnight. Solvent was removed under reduced pressure and residual TFA was removed by the stepwise addition of DCM (3x10 cm<sup>3</sup>), removing solvent under reduced pressure each time to give the ligand as its trifluoroacetate salt, as a glassy solid in quantitative yield. M.p. 142-146°C. m/z (ES<sup>-</sup>): 666 (M<sup>-</sup>). δ<sub>H</sub> (CD<sub>3</sub>OD, 200MHz) : 2.9-3.8(br m, 25H, NCH<sub>2</sub> and NCH<sub>2</sub> ring), 4.11(br s, 2H, CH<sub>2</sub>NH), 8.18 (br s, 2H, Ar H), 8.45 (br s, 1H, Ar H). δ<sub>C</sub>(CD<sub>3</sub>OD, 50.3 MHz) : 41.11(CH<sub>2</sub>NH) 42.41, 47.83, 49.21, 52.11 (CH<sub>2</sub>N), 59.42, 60.13, 60.52 (CH<sub>2</sub>CO), 119.81(q, <sup>2</sup>J<sub>CF</sub> 18, C-2(CF<sub>3</sub>)], 125.29(q, <sup>2</sup>J<sub>CF</sub> 18, (C-5(CF<sub>3</sub>)]

128.52 (Ar CH), 128.61(Ar CH), 129.91(Ar CH), 133.06(q,  $^1J_{CF}$  162, CF<sub>3</sub>), 140.64 (Ar C1) 173.41, 174.62(C=O).  $\delta_F$ (D<sub>2</sub>O, 188 MHz): -58.7 (*o*-F), 63.7 (*m*-F) .

### Synthesis of Complexes:

The ligand H<sub>6</sub>L<sup>2</sup>(CF<sub>3</sub>CO<sub>2</sub>)<sub>2</sub> and an equimolar quantity of LnCl<sub>3</sub>(H<sub>2</sub>O)<sub>6</sub> (1:1) (Ln = Eu, Tb, Dy or Yb) were taken into the minimum volume of Purite water (<1mL) and the pH was adjusted to 5.5. The solution was heated at 90 °C for 24 hrs. The reaction mixture was cooled to room temperature and pH was adjusted to 10. The resulting white precipitate was filtered off, and the solution pH was adjusted to 5.5. The solvent was removed by lyophilisation and the residue was extracted from the residue using 10% MeOH/ DCM to yield a colourless or pale cream solid. For each complex, excellent agreement was observed between found and calculated isotope patterns for their negative ion electrospray mass spectra, using solutions presented in methanol.

[Eu.L<sup>2</sup>]: m/z (MeOH, ES<sup>-</sup>): 812, 814; Found: 812.0842; C<sub>24</sub>H<sub>29</sub>O<sub>8</sub>N<sub>5</sub>F<sub>6</sub>SEu requires: 812.0845;  $\delta_F$ (D<sub>2</sub>O, 188MHz) pH 5.5: -65.19, -63.90, -58.97, -53.4 (1:1;1;1); pH 10.2: -65.15, -53.36, pH 4.2: -63.87, -58.93.

[Tb.L<sup>2</sup>]: m/z (MeOH, ES<sup>-</sup>): 820, 821; Found 820.0887; C<sub>24</sub>H<sub>29</sub>O<sub>8</sub>N<sub>5</sub>F<sub>6</sub>STb requires: 820.0890;  $\delta_F$ (D<sub>2</sub>O, 188MHz): pH 5.5: br -45.5, br -61.5, -157.5.  
pH 10 : -44.87, -159.59; pH 3.5 : -63.9, -58.89

[Dy.L<sup>2</sup>]: m/z (ES<sup>-</sup>): 822, 823, 824, 825, 826; Found: 822.0913; C<sub>24</sub>H<sub>29</sub>O<sub>8</sub>N<sub>5</sub>F<sub>6</sub>SDy requires: 822.0916 ;  $\delta_F$ (D<sub>2</sub>O, 188MHz): pH 6.0: -38.95, br 59.1, 159.18; pH 10: -39.39, -158.41; pH 3.5: -59.13, -64.22.

[Yb.L<sup>2</sup>] (exists as mixture of two major isomers): m/z (ES<sup>-</sup>): 831, 832, 833, 834, 835, 836, 837, 838; Found: 833.1010 ; C<sub>24</sub>H<sub>29</sub>O<sub>8</sub>N<sub>5</sub>F<sub>6</sub>SyYb requires: 822.1010;  $\delta_F$ (D<sub>2</sub>O, 188MHz): pH 6.0: br -22.88, br 39.66, -61.11, -65.07, br -70.3; pH10: br -22.73, br -39.82, br -70.63; pH 3.5 : br -59.05 (minor), br -61.77, br 64.29 (minor), br -65.77.

### 3-Trifluoromethyl-4-nitro- methoxyethoxymethylbenzene

3-Trifluoromethyl-4-nitro-phenol (1.0, g, 4.9 mmol) and sodium hydride (0.11, 4.9 mmol) were taken to anhydrous THF (30 ml). MEM chloride (0.6, 4.9 mmol) was added to the solution keeping the temperature below 0°C using iso-propanol and dry ice. The solution was warmed to room temperature and stirred for 1h. Inorganic residues were filtered off; solvent was removed under reduced pressure to leave a pale yellow residue. The product was isolated following purification using column chromatography on silica, (DCM/ 2% MeOH, R<sub>f</sub> = 0.4, DCM) to give a pale yellow oil, (1.2g, 85%), m/z (ES<sup>+</sup>): 318 [(M+Na)<sup>+</sup>].  $\delta_H$  (CDCl<sub>3</sub>, 200MHz): 3.35 (s, 3H, O-CH<sub>3</sub>), 3.53 (t, J = 6Hz, 2H, O-CH<sub>2</sub>), 3.82 (t, J = 6Hz, 2H, O-CH<sub>2</sub>), 5.36 (s, 2H, O-CH<sub>2</sub>-O), 7.32 (dd, J H-H(o) = 8Hz, J H-H(m) = 4Hz, 1H, Ar H ortho), 7.43 (d, J<sub>H-H(m)</sub> = 4Hz, 1H, Ar H ortho), 7.96 (d, J<sub>H-H(o)</sub> = 8Hz, 1H, Ar H meta).  $\delta_C$  (CDCl<sub>3</sub>, 50.3MHz): 58.85 (O-CH<sub>3</sub>), 68.54 (O-CH<sub>2</sub>), 71.47 (O-CH<sub>2</sub>), 93.75 (O-CH<sub>2</sub>-O), 116.44 (q,  $^2J_{CF}$  = 18Hz, C (CF<sub>3</sub>)), 118.91(Ar CH), 119.24( Ar C), 125.64( q,  $^1J_{CF}$  = 162 Hz, CF<sub>3</sub>), 127.95 (Ar CH), 141.61 (Ar C), 160.61 (Ar CH).  $\delta_F$ (CDCl<sub>3</sub>, 188MHz): 60.59 (s).

### 3-Trifluoromethyl- 4 – amino-methoxyethoxymethylbenzene.

3-Trifluoromethyl-4-nitro-methoxyethoxymethylbenzene. (1.2 g, 4.1 mmol) was dissolved in ethanol and a catalytic amount of Pd(OH)<sub>2</sub>/C was added and the mixture stirred at room temperature under hydrogen (40 psi) for 24 hrs. Catalyst was filtered and solvent removed under reduced pressure to give a pale yellow oil in quantitative yield. m/z (ES<sup>+</sup>):288 [(M+Na)<sup>+</sup>],  $\delta_{\text{H}}$  (CDCl<sub>3</sub>, 200MHz): 3.30(s, 3H, O-CH<sub>3</sub>), 3.50(t, J = 6Hz, 2H, O-CH<sub>2</sub>), 3.75(t, J = 6Hz, 2H, O-CH<sub>2</sub>), 5.15(s, 2H, O-CH<sub>2</sub>-O), 6.77 (d, J<sub>H-H(o)</sub> = 8Hz, 1H, Ar H ortho), 7.00 (d, J<sub>H-H(o)</sub> = 8Hz, 1H, Ar H meta), 7.15(s, 1H, Ar H ortho).  $\delta_{\text{C}}$  (CDCl<sub>3</sub>, 50.3Hz): 59.18 (O-CH<sub>3</sub>), 67.78(O-CH<sub>2</sub>), 71.76 (O-CH<sub>2</sub>), 94.66(O-CH<sub>2</sub>-O), 115.18 (q, <sup>2</sup>J<sub>CF</sub> = 18Hz, CCF<sub>3</sub>), 119.21(Ar CH), 125.64 (q, <sup>1</sup>J<sub>CF</sub> = 162 Hz, CF<sub>3</sub>), 122.22 (Ar CH), 123.29( Ar C), 138.72 (Ar C), 149.74 (Ar CH).  $\delta_{\text{F}}$ (CDCl<sub>3</sub>, 188MHz): 60.59 (s).

### 3-Trifluoromethyl-4-(chloroethanoyl)-methoxyethoxymethylbenzene 3.

3-Trifluoromethyl-4-amino-methoxyethoxymethylbenzene (0.5g, 0.2 mmol), and N-hydroxysuccinimidyl chloroacetate (0.36g, 0.2 mmol) were dissolved in dichloromethane (10 cm<sup>3</sup>), and stirred at room temperature overnight. Solvent was removed and the product purified using column chromatography on silica, (DCM/MeOH, R<sub>f</sub> = 0.6, 5% MeOH/DCM), followed by recrystallisation from hexane/EtOAc to give a white solid, (0.25g, 52%), m.p. 72-74°C, Found C, 45.76%, H, 4.63%, N, 4.21%. C<sub>13</sub>H<sub>15</sub>NO<sub>4</sub>F<sub>3</sub>Cl requires C, 45.72%, H, 4.43%, N, 4.13%, m/z (ES<sup>+</sup>):341 (M<sup>+</sup>), 364 [(M+Na)<sup>+</sup>],  $\delta_{\text{H}}$  (CDCl<sub>3</sub>, 400MHz): 3.37(s, 3H, O-CH<sub>3</sub>), 3.55(t, J = 4.8 Hz, 2H, O-CH<sub>2</sub>), 3.81(t, J = 4.8Hz, 2H, O-CH<sub>2</sub>), 4.22 (s, 2H, CH<sub>2</sub>Cl), 5.28(s, 2H, O-CH<sub>2</sub>-O), 7.27 (d, J<sub>H-H(o)</sub> = 8Hz, 1H, Ar H ortho), , 7.34(s, 1H, Ar H ortho). 7.96 (d, J<sub>H-H(o)</sub> = 8Hz, 1H, Ar H meta), 8.57 (br s, 1H, NH).  $\delta_{\text{C}}$ (CDCl<sub>3</sub>, 100.6Hz): 43.10 (CH<sub>2</sub>Cl), 59.25 (O-CH<sub>3</sub>), 68.09(O-CH<sub>2</sub>), 71.68 (O-CH<sub>2</sub>), 93.82( O-CH<sub>2</sub>-O), 114.65 (q, <sup>2</sup>J<sub>CF</sub> = 18Hz, CCF<sub>3</sub>), 120.37(Ar CH), 122.97( q, <sup>1</sup>J<sub>CF</sub> = 162 Hz, CF<sub>3</sub>),126.89 (Ar CH), 127.96( Ar C),154.82 (Ar C), 164.63 (Ar CH),178.54 (C=O)],  $\delta_{\text{F}}$ (CDCl<sub>3</sub>, 188MHz): 61.5 (s).

### Ligand L<sup>3a</sup>.

3-Trifluoromethyl-4-(chloroethanoyl)-methoxyethoxymethylbenzene,3, (0.10g,0.3mmol) was added to a solution of 1,4,7-tris(t-butoxycarbonylmethyl)-1,4,7,10-tetraazacyclododecane(1) (0.16g, 0.31mmol) and K<sub>2</sub>CO<sub>3</sub> (0.04g, 0.63mmol) in acetonitrile (10 cm<sup>3</sup>) and the mixture was boiled under reflux overnight. Inorganic solids were filtered off, solvent was removed and the product was purified using column chromatography on silica, 5% MeOH / DCM R<sub>f</sub> = 0.2) to give a clear oily product, (0.10g, 79%). m/z (ES<sup>+</sup>): 821 (M<sup>+</sup>), 844 [(M+Na)<sup>+</sup>],  $\delta_{\text{H}}$  (CDCl<sub>3</sub>, 400MHz):1.42 (S, 27H, t-Bu), 2.13-2.62 (br,16H, ring CH<sub>2</sub>N), 2.72-3.10(m, 6H, NCH<sub>2</sub>CO), 3.09 (br,4H,NCH<sub>2</sub>), 3.31 (s,br,1H,NH), 3.55 (s, 3H, OCH<sub>3</sub>), 3.54 (d, J = 4.8 Hz, 2H, OCH<sub>2</sub>), 3.78 (d, J = 4.8 Hz, 2H, OCH<sub>2</sub>), 5.22 (2H, s, OCH<sub>2</sub>O), 7.15 (d, J<sub>H-H(o)</sub> = 8Hz, 1H, Ar H ortho), 7.25(s, 1H, Ar H ortho). 7.45 (d, J<sub>H-H(o)</sub> = 8Hz, 1H, Ar H meta).  $\delta_{\text{C}}$ (CDCl<sub>3</sub>, 100.6 MHz) : 28.06,28.38 (C(CH<sub>3</sub>)), 43.06(CH<sub>2</sub>NH), 52.21, 53.61, 55.62,56.90, 58.51 (CH<sub>2</sub>N), 56.43, 57.21, 57.53 (CH<sub>2</sub>CO), 59.25 (O-CH<sub>3</sub>), 68.09(O-CH<sub>2</sub>), 71.68 (O-CH<sub>2</sub>), 81.94 (CCH<sub>3</sub>), 93.82( O-CH<sub>2</sub>-O), 114.65 (q, <sup>2</sup>J<sub>CF</sub> = 18Hz, C(CF<sub>3</sub>)), 120.37(Ar CH), 122.97( q, <sup>1</sup>J<sub>CF</sub> = 162 Hz, CF<sub>3</sub>),126.89 (Ar CH),

127.96( Ar C), 154.82 (Ar C), 164.63 (Ar CH), 171.4, 171.6 (C=O), 178.54 (C=O),  
 $\delta_F(\text{CDCl}_3, 376.3\text{MHz})$ : 61.14(s)

### $\text{H}_5\text{L}^3(\text{CF}_3\text{CO}_2)_2$

Ligand  $\text{L}^3$  (0.10g, 0.12 mmol) was dissolved in dichloromethane ( $2\text{cm}^3$ ) and TFA ( $3\text{cm}^3$ ) was added and the mixture was stirred at room temperature overnight. Solvent was removed under reduced pressure. Traces of TFA were removed by the successive addition of DCM ( $3 \times 10\text{cm}^3$ ) removing solvent each time under reduced pressure to give the trifluoroacetate salt, as a glassy solid, m.p. 122-124 °C. m/z (ES<sup>-</sup>): 563 (M).  
 $\delta_H(\text{CD}_3\text{OD}, 400\text{MHz})$ : 2.9-3.8(br m, 25H, NCH<sub>2</sub> and NCH<sub>2</sub> ring), 4.11(br s, 2H, CH<sub>2</sub>NH), 7.75 (d,  $J_{\text{H-H(o)}} = 8\text{Hz}$ , 1H, Ar H ortho), 7.95(s, 1H, Ar H ortho). 8.31 (d,  $J_{\text{H-H(o)}} = 8\text{Hz}$ , 1H, Ar H meta).  $\delta_C(\text{CD}_3\text{OD}, 50.3\text{MHz})$ : 41.11(CH<sub>2</sub>NH) 42.41, 47.83, 49.21, 52.11(CH<sub>2</sub>N), 59.422, 60.13, 60.52(CH<sub>2</sub>CO), 119.80 (q,  $^2J_{\text{CF}} = 18\text{Hz}$ , C(CF<sub>3</sub>), 121.32(Ar CH), 124.97 (q,  $^1J_{\text{CF}} = 162\text{Hz}$ , CFC<sub>3</sub>), 127.89 (Ar CH), 129.96 (Ar C), 130.82 (Ar C), 168.63 (Ar CH), 178.54 (C=O).  $\delta_F(\text{CD}_3\text{OD}, 376.3\text{MHz})$ : 61.54(s)

### 3. Equations defining magnetic field and T dependence of relaxation rates

The electron-nuclear interaction is modulated by electron spin relaxation, molecular tumbling and chemical exchange. The relaxation rates are determined by contributions from the hyperfine (negligible for all but Gd), dipolar and Curie mechanisms:

$$R_{iM} = R_{icon} + R_{idip} + R_{i\chi} \quad (1)$$

for Ln ions with short electronic relaxation times:  $R_{1dip} = R_{2dip} = \frac{4}{3} \left( \frac{\mu_o}{4\pi} \right)^2 \frac{\gamma^2 \mu_{eff}^2 T_{1e}}{r^6}$  (2)

Curie spin contribution to  $R_2 > R_1$ :  $R_{1\chi} = \frac{6}{5} \left( \frac{\mu_o}{4\pi} \right)^2 \frac{\gamma^2 \mu_{eff}^4 B_o^2}{(3kT)^2 r^6} \left( \frac{\tau_r}{1 + \omega^2 \tau_r^2} \right)$  (3)

$$R_{2\chi} = \frac{1}{5} \left( \frac{\mu_o}{4\pi} \right)^2 \frac{\gamma^2 \mu_{eff}^4 B_o^2}{(3kT)^2 r^6} \left( \frac{4\tau_r + \frac{3\tau_r}{1 + \omega^2 \tau_r^2}}{1 + \omega^2 \tau_r^2} \right) \quad (4)$$
